# Supplementary material for: Research Advances in Genetic Mechanisms of Major Cucumber Diseases Resistance
Source: Frontiers journal article supplement (doi:10.3389/fpls.2022.862486), 2022-05-19
Supplement: Table_1.pdf [file Table_1.pdf]

**Supplementary Table 1 Overview of molecular markers, QTLs and candidate genes/proteins involved in PM, DM and FW resistance in cucumber.**

| Disease        | Causal agent                                                                                                                                   | Typical symptoms                                                                                                                                                                                                                                                                 | Resistance donor                                                                                      | Mapping<br>Population                                                                                                                           | QTLs / candidate<br>genes/proteins                                                                                                                                                                                                                                        | Involved<br>pathways                                                                                                      | Function verification                        | References                                                                                                  |
|----------------|------------------------------------------------------------------------------------------------------------------------------------------------|----------------------------------------------------------------------------------------------------------------------------------------------------------------------------------------------------------------------------------------------------------------------------------|-------------------------------------------------------------------------------------------------------|-------------------------------------------------------------------------------------------------------------------------------------------------|---------------------------------------------------------------------------------------------------------------------------------------------------------------------------------------------------------------------------------------------------------------------------|---------------------------------------------------------------------------------------------------------------------------|----------------------------------------------|-------------------------------------------------------------------------------------------------------------|
| Powdery mildew | <i>Podosphaera xanthii</i><br>( <i>Sphaerotheca fuliginea</i> ) and<br><i>Golovinomyces cichoracearum</i><br>( <i>Erysiphe cichoracearum</i> ) | mainly invades cotyledon, leaves and stems occur in the whole development period of cucumber, and the disease is serious in the middle and late stages of plant growth, resulting in yellow leaves, crisp and dry, seriously affecting the photosynthesis of cucumber leaves and | WI 2757 and True Lemon<br><br><br><br><br><br>H136 and BK2<br><br>S1003 and S1001<br><br>H136 and BK2 | F <sub>2:3</sub> populations<br><br><br><br><br><br>F <sub>2</sub> population<br><br>F <sub>2</sub> population<br><br>F <sub>2</sub> population | <i>Pm1.1</i> and <i>Pm1.2</i> for leaf resistance;<br><br><i>pm3.1</i> and <i>pm4.1</i> for leaf or hypocotyls;<br><br><i>pm5.1</i> for cotyledon, <i>pm5.2</i> for hypocotyl<br><br><i>pm5.3</i> and <i>pm6.1</i><br><br><i>pm5.1</i><br><br><i>Pm1.1</i> , <i>pm6.1</i> | -<br><br><br><br><br><br>-<br><br>-<br><br>defense<br><br>response, toxin<br><br>metabolism, cell<br><br>stress response, | -<br><br><br><br><br><br>-<br><br>-<br><br>- | He et al., 2013<br><br><br><br><br><br>Zhang et al., 2015<br><br>Nie et al., 2015<br><br>Zhang et al., 2015 |

| reducing<br>yield. | cucumber              |      |                           |                             |                | and<br>injury<br>response |                   |
|--------------------|-----------------------|------|---------------------------|-----------------------------|----------------|---------------------------|-------------------|
|                    | PI 197088             | and  | RILs population           | <i>pm1.1, pm2.1, pm5.1,</i> | -              | -                         | Wang et al., 2018 |
|                    | Coolgreen             |      |                           | <i>pm6.1</i>                |                |                           |                   |
|                    | a cucumber            | core | -                         | <i>pmG1.1,</i>              | <i>pmG1.2,</i> | -                         | Liu et al., 2021  |
|                    | germplasm             |      |                           | <i>pmG2.1, pmG2.2,</i>      |                |                           |                   |
|                    | (CG) consisting of 94 |      |                           | <i>pmG3.1,</i>              | <i>pmG4.1,</i> |                           |                   |
|                    | resequenced lines     |      |                           | <i>pmG4.2,</i>              | <i>pmG5.1,</i> |                           |                   |
|                    |                       |      |                           | <i>pmG5.2,</i>              | <i>pmG5.3,</i> |                           |                   |
|                    |                       |      |                           | <i>pmG5.4,</i>              | <i>pmG6.1,</i> |                           |                   |
|                    |                       |      |                           | and <i>pmG6.2</i>           |                |                           |                   |
|                    | SSSL0.7 and Jin5-508  |      | F <sub>2</sub> population | <i>Pm1.1</i>                | cysteine-rich  | -                         | Xu et al., 2016   |
|                    |                       |      |                           | ( <i>Csa1M064780</i> and    | receptor-like  |                           |                   |
|                    |                       |      |                           | <i>Csa1M064790</i> )        | protein kinase |                           |                   |
|                    | NCG122 and NCG121     |      | F <sub>2</sub> population | <i>pm-s</i> (Csa5G623470)   | encoding       | -                         | Liu et al., 2017  |
|                    |                       |      |                           |                             | Mlo-related    |                           |                   |
|                    |                       |      |                           |                             | protein.       |                           |                   |

|                        |     |                            |                                                        |                                                                                              |                                                            |                                |
|------------------------|-----|----------------------------|--------------------------------------------------------|----------------------------------------------------------------------------------------------|------------------------------------------------------------|--------------------------------|
| Changchunmici IL52     | and | F <sub>2</sub> and RILs    | <i>Pm/dm5.2</i> ,<br><i>Csa5M622830.1</i>              | encodes a transcriptional factor                                                             | -                                                          | Zhang et al., 2018             |
| PM-R and PM-S          |     | F <sub>2</sub> populations | <i>pm5.2</i> and <i>pm6.1</i> ,<br><i>CsGy5G015660</i> | encoding a putative leucine-rich repeat receptor-like serine/threonine-protein kinase (RPK2) | -                                                          | Zhang et al., 2021             |
| S1003 and S05          |     | -                          | <i>CsaMLO1</i>                                         | a cell membrane protein                                                                      | Ectopic expression in <i>Atmlo2 Atmlo12</i> double mutants | Nie et al., 2015               |
| 9930, cv. <i>Anaxo</i> |     | no                         | <i>CsaMLO1</i> , <i>CsaMLO8</i> , <i>CsaMLO11</i>      | encode a plasma membrane-anchored                                                            | Heterologous overexpression in the                         | Schouten et al., 2014; Berg et |

|                     |   |                             |                   |                          |                    |
|---------------------|---|-----------------------------|-------------------|--------------------------|--------------------|
|                     |   |                             | ored protein with | tomato <i>mlo</i> mutant | al., 2017          |
|                     |   |                             | seven             |                          |                    |
|                     |   |                             | transmembrane     |                          |                    |
|                     |   |                             | helices           |                          |                    |
| SSL508-28, Jin5-508 | - | 8 candidate genes           | encoding          | -                        | Xu et al., 2017    |
| and D8              |   | underlie the <i>Pm5.1</i> ( | receptor protein  |                          |                    |
|                     |   | <i>Csa5G569350</i> ,        | kinases,          |                          |                    |
|                     |   | <i>Csa5G606310</i> ,        | transcription     |                          |                    |
|                     |   | <i>Csa5G600370</i> ,        | factors, remorin  |                          |                    |
|                     |   | <i>Csa5G600380</i> ,        | proteins, a       |                          |                    |
|                     |   | <i>Csa5G604040</i> ,        | P-type ATPase     |                          |                    |
|                     |   | <i>Csa5G606540</i> ,        | and a 70 kDa      |                          |                    |
|                     |   | <i>Csa5G606730</i> ,        | heat shock        |                          |                    |
|                     |   | <i>Csa5G512930</i> )        | protein.          |                          |                    |
| BK2 and H136        | - | 2312 DEGs                   | Hormone           | -                        | Zhang et al., 2021 |
|                     |   |                             | signaling,        |                          |                    |
|                     |   |                             | defense           |                          |                    |

|                  |   |           |                  |                    |
|------------------|---|-----------|------------------|--------------------|
|                  |   |           | response,pathog  |                    |
|                  |   |           | en response, and |                    |
|                  |   |           | peroxidase,      |                    |
|                  |   |           | NBS, glucanase   |                    |
|                  |   |           | and chitinase    |                    |
|                  |   |           | pathways         |                    |
| XY09-118 and Q10 | - | 5478 DEGs | plant hormone    | Zheng et al., 2021 |
|                  |   |           | signal           |                    |
|                  |   |           | transduction,    |                    |
|                  |   |           | phenylpropanoid  |                    |
|                  |   |           | biosynthesis,    |                    |
|                  |   |           | plant-           |                    |
|                  |   |           | pathogen         |                    |
|                  |   |           | interaction and  |                    |
|                  |   |           | the MAPK         |                    |
|                  |   |           | signalling       |                    |
|                  |   |           | pathway ,        |                    |

|              |   |                                                             |                                                                                                                               |   |                    |
|--------------|---|-------------------------------------------------------------|-------------------------------------------------------------------------------------------------------------------------------|---|--------------------|
|              |   |                                                             | encoding                                                                                                                      |   |                    |
|              |   |                                                             | WRKY, NAC                                                                                                                     |   |                    |
|              |   |                                                             | and TCP                                                                                                                       |   |                    |
| BK2 and H136 | - | 5832 DEGs and 971 DAMs                                      | flavonoid, hormone, fatty acid and diterpenoid metabolisms.                                                                   | - | Zhang et al., 2021 |
| Rijiecheng   | - | miR319a-JRL3, miR6300-BEE1, miR6300-DAHP1 and miR6300-PERK2 | JRL3 contains three jacalin-like lectin domains, BEE1 encoded a bHLH domain, DAHP1 encodes a 3-deoxy-D-arabi no-heptulosonate | - | Xu et al., 2020    |

|                      |     |     |   |                                  |                   |                   |                   |
|----------------------|-----|-----|---|----------------------------------|-------------------|-------------------|-------------------|
|                      |     |     |   |                                  | 7-phosphate       |                   |                   |
|                      |     |     |   |                                  | synthase          |                   |                   |
| S1003                | and | NIL | - | 119                              | phenylpropanoid   | -                 | Nie et al., 2021  |
| ( <i>Pm5.1</i> )     |     |     |   | lncRNAs and 136                  | biosynthesis,     |                   |                   |
|                      |     |     |   | mRNAs                            | phenylalanine     |                   |                   |
|                      |     |     |   |                                  | metabolism,       |                   |                   |
|                      |     |     |   |                                  | ubiquinone and    |                   |                   |
|                      |     |     |   |                                  | other             |                   |                   |
|                      |     |     |   |                                  | terpenoid-quinon  |                   |                   |
|                      |     |     |   |                                  | e                 |                   |                   |
|                      |     |     |   |                                  | biosynthesis, and |                   |                   |
|                      |     |     |   |                                  | endocytosis.      |                   |                   |
| D8 and SSL508-28.    |     |     | - | <i>NRPI</i> ( <i>Csa5G606550</i> | nodulin-related   | -                 | Xu et al., 2019   |
|                      |     |     |   | )                                | protein 1         |                   |                   |
| XinTaiMiCi, JinYan4, |     |     | - | Cs TCTP1, Cs                     | Defense           | Transient         | Meng et al., 2018 |
| B21-a-2-2-2,         |     |     |   | TCTP2                            | response          | or transformation |                   |
| B21-a-2-1-2          |     |     |   |                                  | ABA               | or TOR            |                   |

|              |                                   |                                                                                                                                                                       |                                                                                             |                                                                                                    |   |                                                                                                                                                                                                                                                                                     |                    |                         |                                                                                                              |  |
|--------------|-----------------------------------|-----------------------------------------------------------------------------------------------------------------------------------------------------------------------|---------------------------------------------------------------------------------------------|----------------------------------------------------------------------------------------------------|---|-------------------------------------------------------------------------------------------------------------------------------------------------------------------------------------------------------------------------------------------------------------------------------------|--------------------|-------------------------|--------------------------------------------------------------------------------------------------------------|--|
|              |                                   |                                                                                                                                                                       |                                                                                             |                                                                                                    |   |                                                                                                                                                                                                                                                                                     | signaling          |                         |                                                                                                              |  |
|              |                                   |                                                                                                                                                                       |                                                                                             |                                                                                                    |   |                                                                                                                                                                                                                                                                                     | pathways           |                         |                                                                                                              |  |
|              |                                   |                                                                                                                                                                       | B21-a-2-1-2                                                                                 | and                                                                                                | - | <i>CsRSF1</i> and <i>CsRSF2</i>                                                                                                                                                                                                                                                     | nucleotide-binding | transient silencing and | Wang et al., 2020                                                                                            |  |
|              |                                   |                                                                                                                                                                       | B21-a-2-2-2                                                                                 |                                                                                                    |   |                                                                                                                                                                                                                                                                                     | ng                 | Transient               |                                                                                                              |  |
|              |                                   |                                                                                                                                                                       |                                                                                             |                                                                                                    |   |                                                                                                                                                                                                                                                                                     | site-leucinerich   | transformation          |                                                                                                              |  |
|              |                                   |                                                                                                                                                                       |                                                                                             |                                                                                                    |   |                                                                                                                                                                                                                                                                                     | repeats            |                         |                                                                                                              |  |
|              |                                   |                                                                                                                                                                       |                                                                                             |                                                                                                    |   |                                                                                                                                                                                                                                                                                     | (NBS-LRR)          |                         |                                                                                                              |  |
|              |                                   |                                                                                                                                                                       |                                                                                             |                                                                                                    |   |                                                                                                                                                                                                                                                                                     | proteins           |                         |                                                                                                              |  |
| Downy mildew | <i>Pseudoperonospora cubensis</i> | mainly infects leaves and can also harm stems and inflorescences. It can occur from seedling stage to adult stage, especially when cucumber enters the harvest stage. | CS-PMR1 and Santou PI 197087 and WI7120 (PI330628) and 9930 TH118FLM and WMEJ PI 197088 and | RILs F <sub>2</sub> F <sub>2:3</sub> population F <sub>2</sub> and F <sub>2:3</sub> F <sub>2</sub> |   | <i>dm1.1</i> , <i>dm5.1</i> and <i>dm5.3</i><br><i>Dm1</i> , <i>Dm2</i> , <i>Dm3</i><br><i>dm2.1</i> , <i>dm4.1</i> , <i>dm5.1</i> and <i>dm6.1</i><br><i>dm2.2</i> , <i>dm4.1</i> , <i>dm5.1</i> , <i>dm5.2</i> , and <i>dm6.1</i><br><i>dm1.1</i> , <i>dm3.1</i> , <i>dm4.1</i> , | -                  | -                       | Yoshioka et al., 2014<br>Szczeczura et al., 2015<br>Wang et al., 2016<br>Win et al., 2017<br>Li et al., 2018 |  |



|                       |                    |  |                           |   |   |                     |
|-----------------------|--------------------|--|---------------------------|---|---|---------------------|
| Changchunmici         |                    |  | <i>dm5.1, dm5.2</i>       |   |   |                     |
| CSL0067               | and F <sub>2</sub> |  | <i>Cot7_5.1_1,</i>        | - | - | Innark et al., 2020 |
| CSL0139               |                    |  | <i>Cot7_5.1_2,</i>        |   |   |                     |
|                       |                    |  | <i>Cot10_5.1,</i>         |   |   |                     |
|                       |                    |  | <i>Cot14_5.1</i>          |   |   |                     |
|                       |                    |  | <i>First7_1.1</i>         |   |   |                     |
|                       |                    |  | <i>First7_6</i>           | , |   |                     |
|                       |                    |  | <i>First14_5.1_1,</i>     |   |   |                     |
|                       |                    |  | <i>First14_5.1_2,</i>     |   |   |                     |
|                       |                    |  | <i>First14_6,</i>         |   |   |                     |
|                       |                    |  | <i>Second10_6,</i>        |   |   |                     |
|                       |                    |  | <i>Second14_2,</i>        |   |   |                     |
|                       |                    |  | <i>Second14_5.1,</i>      |   |   |                     |
|                       |                    |  | <i>Second14_6,</i>        |   |   |                     |
| a cucumber core       | -                  |  | <i>dmG1.4, dmG4.1,</i>    | - | - | Liu et al., 2020    |
| germplasm             |                    |  | <i>dmG4.3, dmG5.2,</i>    |   |   |                     |
| (CG) consisting of 94 |                    |  | <i>dmG7.1, and dmG7.2</i> |   |   |                     |

|                           |                             |                                                                                                 |                                                                                                                                        |                                                                                  |  |                   |
|---------------------------|-----------------------------|-------------------------------------------------------------------------------------------------|----------------------------------------------------------------------------------------------------------------------------------------|----------------------------------------------------------------------------------|--|-------------------|
| resequenced lines         |                             |                                                                                                 |                                                                                                                                        |                                                                                  |  |                   |
| PI 197088 and HS279       | NILs                        | <i>subQTL DM4.1.1</i> ,<br><i>subQTLDM4.1.2</i> ,<br><i>subQTLDM4.1.3</i> ,<br><i>CsLRK10L2</i> | plays a role as a<br>receptor of the<br>DAMP<br>oligogalacturona<br>n,<br>breakdown<br>product of pectin<br>in the plant cell<br>wall. | loss-of-function<br>mutation and<br>heterologous expression<br>in N. benthamiana |  | Berg et al., 2020 |
| Gy14 and WI2757           | F <sub>2:3</sub> population | <i>CsSGR</i>                                                                                    | in the<br>chlorophyll<br>degradation<br>pathway                                                                                        | -                                                                                |  | Wang et al., 2019 |
| Changchunmici and<br>IL57 |                             | 58 unique expressed<br>sequence tags (ESTs)                                                     | nearly the<br>whole process of<br>plant defense                                                                                        | -                                                                                |  | Li et al., 2011   |

---

such as signal  
transduction  
and cell defense,  
transcription,  
cell cycle and  
DNA  
processing,  
protein  
synthesis,  
protein fate,  
proteins with  
binding  
functions,  
transport,  
metabolism and  
energy

---

*dmG1.4*, was WRKY  
*Csa2G060360* for transcription  
*dmG2.1*, factor  
*Csa4G064680* for  
*dmG4.1*,  
*Csa5G606470* for  
*dmG5.2*, and  
*Csa7G004020* for  
*dmG7.1*

IL53 and IL51      F<sub>2</sub> population      Different expressed multiple      Gao et al., 2021  
genes      functions of  
defense  
response:  
pathogen-associa  
ted molecular  
pattern  
recognition,

---

|                    |    |                    |                   |                  |
|--------------------|----|--------------------|-------------------|------------------|
|                    |    |                    | signal            |                  |
|                    |    |                    | transduction,     |                  |
|                    |    |                    | reactive oxygen   |                  |
|                    |    |                    | species and       |                  |
|                    |    |                    | lignin            |                  |
|                    |    |                    | accumulation,     |                  |
|                    |    |                    | and transcription |                  |
|                    |    |                    | regulators.       |                  |
| Jinyou Sihao and - | 17 | differentially     | enhanced energy   | Sun et al., 2021 |
| Changchun Mici     |    | expressed proteins | supply and        |                  |
|                    |    |                    | resistance        |                  |
|                    |    |                    | related proteins, |                  |
|                    |    |                    | balanced ROS      |                  |
|                    |    |                    | production and    |                  |
|                    |    |                    | clearance,        |                  |
|                    |    |                    | accelerated       |                  |
|                    |    |                    | protein           |                  |

|      |   |                                                                                     |                                                                                                     |                                                                                                                                                            |                  |  |
|------|---|-------------------------------------------------------------------------------------|-----------------------------------------------------------------------------------------------------|------------------------------------------------------------------------------------------------------------------------------------------------------------|------------------|--|
|      |   |                                                                                     |                                                                                                     | metabolism and<br>photorespiration<br>The function of<br>reducing<br>photosynthesis,<br>inducing<br>photosystem<br>repair and<br>programmed cell<br>death. |                  |  |
| 9930 | - | 13 <i>ZF-HD</i> genes( <i>Cs</i><br><i>MIF1-CsMIF3</i> ,<br><i>CsZHD1-CsZHD10</i> ) | Zinc                                                                                                | -                                                                                                                                                          | Lai et al., 2021 |  |
|      |   |                                                                                     | finger-homeodo<br>main (ZF-HD)<br>proteins encode<br>a family of<br>plant-specific<br>transcription |                                                                                                                                                            |                  |  |

|               |                                                    |                                                                                                                                                                                   |                                                                                           |                                                                                 |                                                  |                                 |                 |                                                                          |
|---------------|----------------------------------------------------|-----------------------------------------------------------------------------------------------------------------------------------------------------------------------------------|-------------------------------------------------------------------------------------------|---------------------------------------------------------------------------------|--------------------------------------------------|---------------------------------|-----------------|--------------------------------------------------------------------------|
|               |                                                    |                                                                                                                                                                                   |                                                                                           |                                                                                 |                                                  |                                 | factors         |                                                                          |
|               |                                                    |                                                                                                                                                                                   | PI 197088 and -                                                                           |                                                                                 |                                                  | different expressed of          | hormones and -  | Burkhardt and                                                            |
|               |                                                    |                                                                                                                                                                                   | Vlaspik                                                                                   |                                                                                 |                                                  | mRNA and siRNA                  | regulation of   | Day 2016                                                                 |
|               |                                                    |                                                                                                                                                                                   |                                                                                           |                                                                                 |                                                  |                                 | nutrient supply |                                                                          |
|               |                                                    |                                                                                                                                                                                   | R1461                                                                                     | -                                                                               |                                                  | <i>CsIVP</i>                    | a negative RNAi | Yan et al., 2020                                                         |
|               |                                                    |                                                                                                                                                                                   |                                                                                           |                                                                                 |                                                  |                                 | regulator in SA |                                                                          |
|               |                                                    |                                                                                                                                                                                   |                                                                                           |                                                                                 |                                                  |                                 | signaling       |                                                                          |
|               |                                                    |                                                                                                                                                                                   |                                                                                           |                                                                                 |                                                  |                                 | pathway         |                                                                          |
| Fusarium wilt | <i>Fusarium oxysporum</i> f.sp. <i>cucumerinum</i> | a systemic infection of soil-borne fungal diseases and the hyphae of this pathogen penetrated cucumber root, which can cause vascular wilt, leads to necrotic lesions on the stem | 9110Gt and 9930 cv.SMR-18 and cv.Ashley Superina and Rijiecheng Cvs Straight-8 and SMR-18 | F <sub>9</sub> RILs and F <sub>2</sub> population and F <sub>2</sub> population | <i>Foc2.1</i><br><i>Foc</i> gene<br><i>fw2.1</i> | -<br>-<br>-                     | -<br>-<br>-     | Zhang et al., 2014<br>Vakalounakis and Lamprou 2018<br>Dong et al., 2019 |
|               |                                                    |                                                                                                                                                                                   |                                                                                           |                                                                                 |                                                  | SCAR markers for                | -               | Jaber et al., 2020                                                       |
|               |                                                    |                                                                                                                                                                                   |                                                                                           |                                                                                 |                                                  | SCE12M50 <sub>A</sub> and       |                 |                                                                          |
|               |                                                    |                                                                                                                                                                                   |                                                                                           |                                                                                 |                                                  | SCE12M50 <sub>B</sub> linker to |                 |                                                                          |
|               |                                                    |                                                                                                                                                                                   |                                                                                           |                                                                                 |                                                  | <i>Foc</i>                      |                 |                                                                          |

|                                                                                                                         |                          |                           |                                                             |                                                                                                                                                                                                                           |   |                   |
|-------------------------------------------------------------------------------------------------------------------------|--------------------------|---------------------------|-------------------------------------------------------------|---------------------------------------------------------------------------------------------------------------------------------------------------------------------------------------------------------------------------|---|-------------------|
| base, foliar wilting and eventually whole plant wilt and even death, and occur throughout the growth period of cucumber | WIS2757 and Jinyan No. 2 | F <sub>2</sub> population | <i>Foc-4</i>                                                | -                                                                                                                                                                                                                         | - | Zhou et al., 2015 |
|                                                                                                                         | Superina and Rijiecheng  | F <sub>2</sub> population | QTL <i>fw2.1</i>                                            | -                                                                                                                                                                                                                         | - | Dong et al., 2019 |
|                                                                                                                         | Rijiecheng and Superina  | -                         | 4116 differentially expressed genes                         | ethylene signaling                                                                                                                                                                                                        | - | Dong et al., 2020 |
|                                                                                                                         | Rijiecheng               | -                         | miR319a-JRL3, miR6300-BEE1, miR6300-DAHP1 and miR6300-PERK2 | JRL3 contains three jacalin-like lectin domains, TaJRL1 encodes mannosespecific jacalin-like lectin domains and regulates the salicylic acid-dependent and jasmonic acid-dependent pathways, The BEE1 gene encodes a bHLH | - | Xu et al., 2021   |



|              |   |                                                  |                                                                                                           |   |                             |
|--------------|---|--------------------------------------------------|-----------------------------------------------------------------------------------------------------------|---|-----------------------------|
|              |   |                                                  | domain, DAHP1                                                                                             |   |                             |
|              |   |                                                  | encodes a                                                                                                 |   |                             |
|              |   |                                                  | 3-deoxy-D-arabi                                                                                           |   |                             |
|              |   |                                                  | no-heptulosonate                                                                                          |   |                             |
|              |   |                                                  | 7-phosphate                                                                                               |   |                             |
|              |   |                                                  | synthase                                                                                                  |   |                             |
| 9930         | - | 14 chitinase genes,<br>Especially <i>CsChi23</i> | Pathogenesis-rel<br>ated proteins,<br>and catalyzed<br>the hydrolysis of<br>chitin                        | - | Bartholomew et<br>al., 2019 |
| Jinchun No.2 | - | 56 differentially<br>expressed proteins          | Carbohydrate<br>metabolism,<br>amino acid<br>metabolism,<br>defense and<br>stress responses,<br>oxidation |   | Du et al., 2016             |

|                        |                           |                                                                                                                                       |                                                                                                                 |                                                                |  |
|------------------------|---------------------------|---------------------------------------------------------------------------------------------------------------------------------------|-----------------------------------------------------------------------------------------------------------------|----------------------------------------------------------------|--|
|                        |                           |                                                                                                                                       |                                                                                                                 | reduction,<br>metabolism and<br>transport and<br>other process |  |
| 995 and F9             | F <sub>2</sub> population | 15 over-accumulated<br>proteins                                                                                                       | defense and<br>stress responses,<br>oxidation<br>reduction,<br>metabolism and<br>transport and<br>other process | Zhang et al., 2016                                             |  |
| Rijiecheng<br>Superina | and -                     | 32 differentially<br>regulated proteins,<br>three proteins with<br>higher expression,<br><i>TMEM115</i><br>( <i>CsaV3_5G025750</i> ), | MEM115<br>encoding a<br>transmembrane<br>protein, TET8<br>encoding<br>function as a                             | Xu et al., 2021                                                |  |

---

|                          |                   |   |
|--------------------------|-------------------|---|
| <i>TET8(CsaV3_2G007</i>  | tetraspanin,      |   |
| <i>840),TPS10</i>        | TPS10             |   |
| <i>(CsaV3_2G017980),</i> | encoding          | a |
| <i>MGT2</i>              | terpene           |   |
| <i>(CsaV3_7G006660)</i>  | synthaseand,      |   |
|                          | MGT2              |   |
|                          | encoding          | a |
|                          | glycosyltransfera |   |
|                          | se                |   |

---
